# Supplementary material
Source: Research Square preprint supplement (doi:10.21203/rs.3.rs-8779082/v1)
Supplement: Supplementary file 3 [file f11312448c55f217af3e1deb.docx]

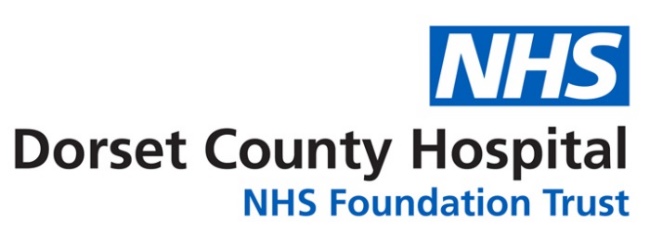


**
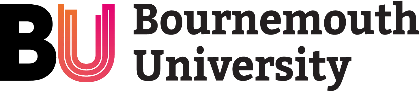
**

IRAS ID:

Study Number:

Participant Identification Number for this trial:

**Patient consent form**

## **PRESCET**: Preoperative Serial Casting, Education, and Therapy for Dupuytren’s Contracture

**Lead researcher: Tahra Babiker-Moore**

This agreement is made between the outpatient hand therapy department on behalf of Dorset County Hospital NHS Foundation Trust and you, the patient, as identified below.

Please **initial each box** if you agree with the statement:

Please initial box

I confirm that I have read the information sheet dated ___/___/202___ (version____) for the
above study. I have had the opportunity to consider the information, ask questions and have
had these answered satisfactorily.

I understand that my participation is voluntary and that I am free to withdraw at any time
without giving any reason, without my medical care or legal rights being affected.

I understand that relevant sections of my medical notes and data collected during
the study, may be looked at by individuals from the research team, from regulatory authorities or
from the NHS Trust, where it is relevant to my taking part in this research. I give permission for
these individuals to have access to my records.

I understand that the information collected about me will be used to support
other research in the future and may be shared anonymously with other researchers.

I agree to provide an email address and for my contact phone details being given to members of the study team, to send me communications about the study. I will maintain the email address provided or, if necessary, supply a new one in the future.

I agree to take part in the above study.

I agree to be contacted by a member of the research team at the end of the study to be asked whether I would be willing to take part in a short interview about my experience of the intervention and the overall study process.

Contact details *(please print):*

Address Email Address Phone number

Name of Participant Date Signature

Name of Person Date Signature

seeking consent


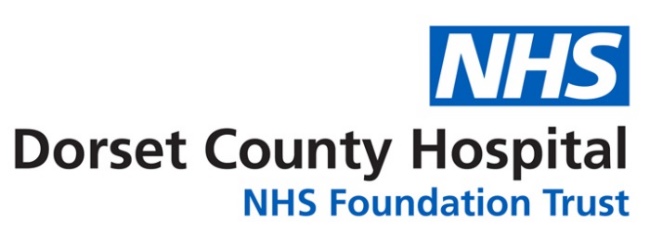


**
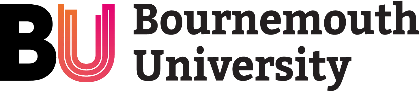
**

IRAS ID:

Study Number:

Participant Identification Number for this trial:

**Patient consent form (interview)**

## **PRESCET**: Preoperative Serial Casting, Education, and Therapy for Dupuytren’s Contracture - Follow-up Interview

**Lead researcher: Tahra Babiker-Moore**

This agreement is made between the outpatient hand therapy department on behalf of Dorset County Hospital NHS Foundation Trust and you, the patient, as identified below.

This consent form is for participants who have previously taken part in the PRESCET study and are being invited to participate in a short follow-up interview about their experience of the intervention and the overall study process.

Please **initial each box** if you agree with the statement:

Please initial box

I confirm that I have read and understood the Participant Information Sheet for the follow-up interview dated ___/___/202___ (version____). I have had the opportunity to consider the information, ask questions and have had these answered satisfactorily.

I understand that my participation in the interview is entirely voluntary and that I am free to decline to answer any questions or to withdraw at any time without giving a reason. This will not affect my medical care or legal rights.

I understand that the anonymised data from my interview may be used in research publications and presentations and may be shared with other researchers for ethically approved research purposes.

I give permission for anonymised quotes from my interview to be used in research publications or presentations.

I agree to take part in a follow-up interview as part of this research study.

Contact details *(please print):*

Address Email Address Phone number

Name of Participant Date Signature

Name of Person Date Signature

seeking consent
